# Supplementary material for: Oncofetal Chondroitin Sulfate Glycosaminoglycans Are Key Players in Integrin Signaling and Tumor Cell Motility
Source: Oxford University Press journal article supplement (doi:10.1158/1541-7786.mcr-16-0103), 2016-09-21
Supplement: 15417786mcr160103-sup-164097_2_supp_3616578_mf76hb.docx [file 15417786mcr160103-sup-164097_2_supp_3616578_mf76hb.docx]

**Table S1**

|  | **Oncofetal CS expression** | | **P value** |
| --- | --- | --- | --- |
|  | **High** | **Low** |
| Age |  |  |  |
| ≤65 years ( n=17) | 12 (29%) | 5 | NS |
| >65 years (n=21) | 15 (24%) | 6 |  |
|  |  |  |  |
| Gender |  |  |  |
| Female (n=8) | 6 (63%) | 2 | NS |
| Male (n=30) | 21 (17%) | 9 |  |
|  |  |  |  |
| Tumour stage |  |  |  |
| Stage I/II/III (n=12) | 11 (42%) | 1 | NS |
| Stage IV (n=25) | 16 (20%) | 9 |  |
|  |  |  |  |
| Histology |  |  |  |
| Well to moderately differentiated (n=19) | 16 (26%) | 3 | NS |
| Poorly differentiated (n=16) | 10 (31%) | 6 |  |
|  |  |  |  |
| No. of distant organ metastasis |  |  |  |
| <6 (n=25) | 18 (20%) | 7 | NS |
| ≥6 (n=13) | 9 (38%) | 4 |  |
| **P values* were calculated by Fisher's exact test. | |  |  |
| *NS* stands for not significant. |  |  |  |

Clinical information related to the pancreatic cancer tissue microarray and its staining with rVAR2.

**Figure S1**

**SiRNA against CSGALNACT1 recapitulates phenotype seen with rVAR2 incubation**

**A,** MG63 cells were treated with SiRNA against CSGALNACT1 (CSGT-1) in a scratch-wound heal assay as in Fig 2A.

**Figure S2**

**CS and Integrin signaling**

**A,** Column based pulldown of integrin subunits using rVAR2 (rV-c) from RH30 cells. Figure shows western blot analysis of eluates in increasing NaCl concentration. An rContr coupled column is used as negative control (rC-C). **B,** Quantification of PLA co-localization analysis between of-CS (rVAR2 stain) and integrin subunits in U2OS cells. **C,** Quantification of PLA co-localization analysis between of-CS (rVAR2 stain) and integrin subunits in MG63 cells.

**Figure S3**

**Slope analysis of subcutaneous B16 tumor initiation**

Number of mice bearing B16 xenografts tumors at different time points after inoculation. Mice received rVAR2 or rControl at days  0,6 and 9. Linear regression and slope analysis show a slower tumor initiation in the rVAR2 treated arm compared to rControl. We tested whether slopes and intercepts differ between the two groups using a covariance analysis in Prism. p-Value = 0.0082 (**)
